# Supplementary material for: The TLR7/8 agonist INI-4001 enhances the immunogenicity of a Powassan virus-like-particle vaccine
Source: PubMed Central journal article supplement (PMC11642962; doi:10.1101/2024.11.28.625832), 2024-12-03
Supplement: NIHPP2024.11.28.625832V1-supplement-1.pdf [file NIHPP2024.11.28.625832V1-supplement-1.pdf]

## Supporting information

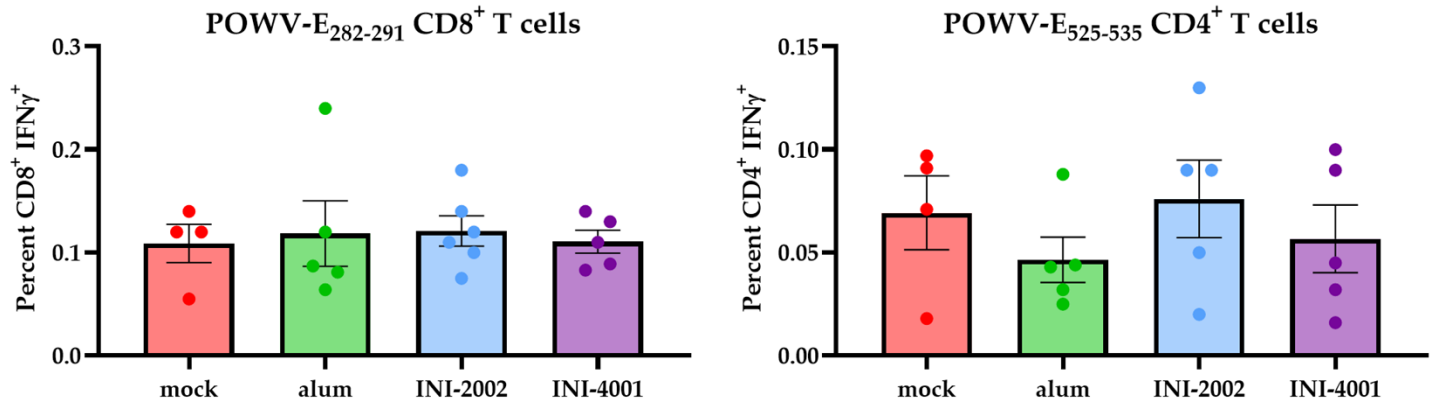

**S1 Fig. Vaccination does not induce measurable CD8<sup>+</sup> or CD4<sup>+</sup> T cell responses.** (A-B) Mice prime-boost vaccinated 4 weeks apart *sc* with 10<sup>6</sup> FFUe of VLP alone or adjuvanted with 300 $\mu$ g alum, 1nmol INI-2002, or 10nmol INI-4001. Mock group injected with PBS vehicle alone. n=4-5. Spleens collected 4 weeks post-boost, and splenocytes incubated with POWV-E<sub>282-291</sub> (A) or POWV-E<sub>525-535</sub> (B) for CD8<sup>+</sup> and CD4<sup>+</sup> T cells, respectively. Cells were then stained and gated on CD19- CD4<sup>+</sup>/CD8<sup>+</sup> and intracellularly stained for IFN $\gamma$ . Data are reported as percentage of IFN $\gamma$ <sup>+</sup> T cells either within the CD8<sup>+</sup> (A) or CD4<sup>+</sup> (B) compartments  $\pm$  SEM. Data represent one experiment. Statistical significance determined by one-way ANOVA and Šídák's multiple comparisons test to compare treatments to mock; no statistically significant differences were found.
